# Supplementary material
Source: Springer Nature journal article supplement (https://www.springermedizin.de/resource/supplementary/12933_2010_272_MOESM3_ESM.pdf/9539988)

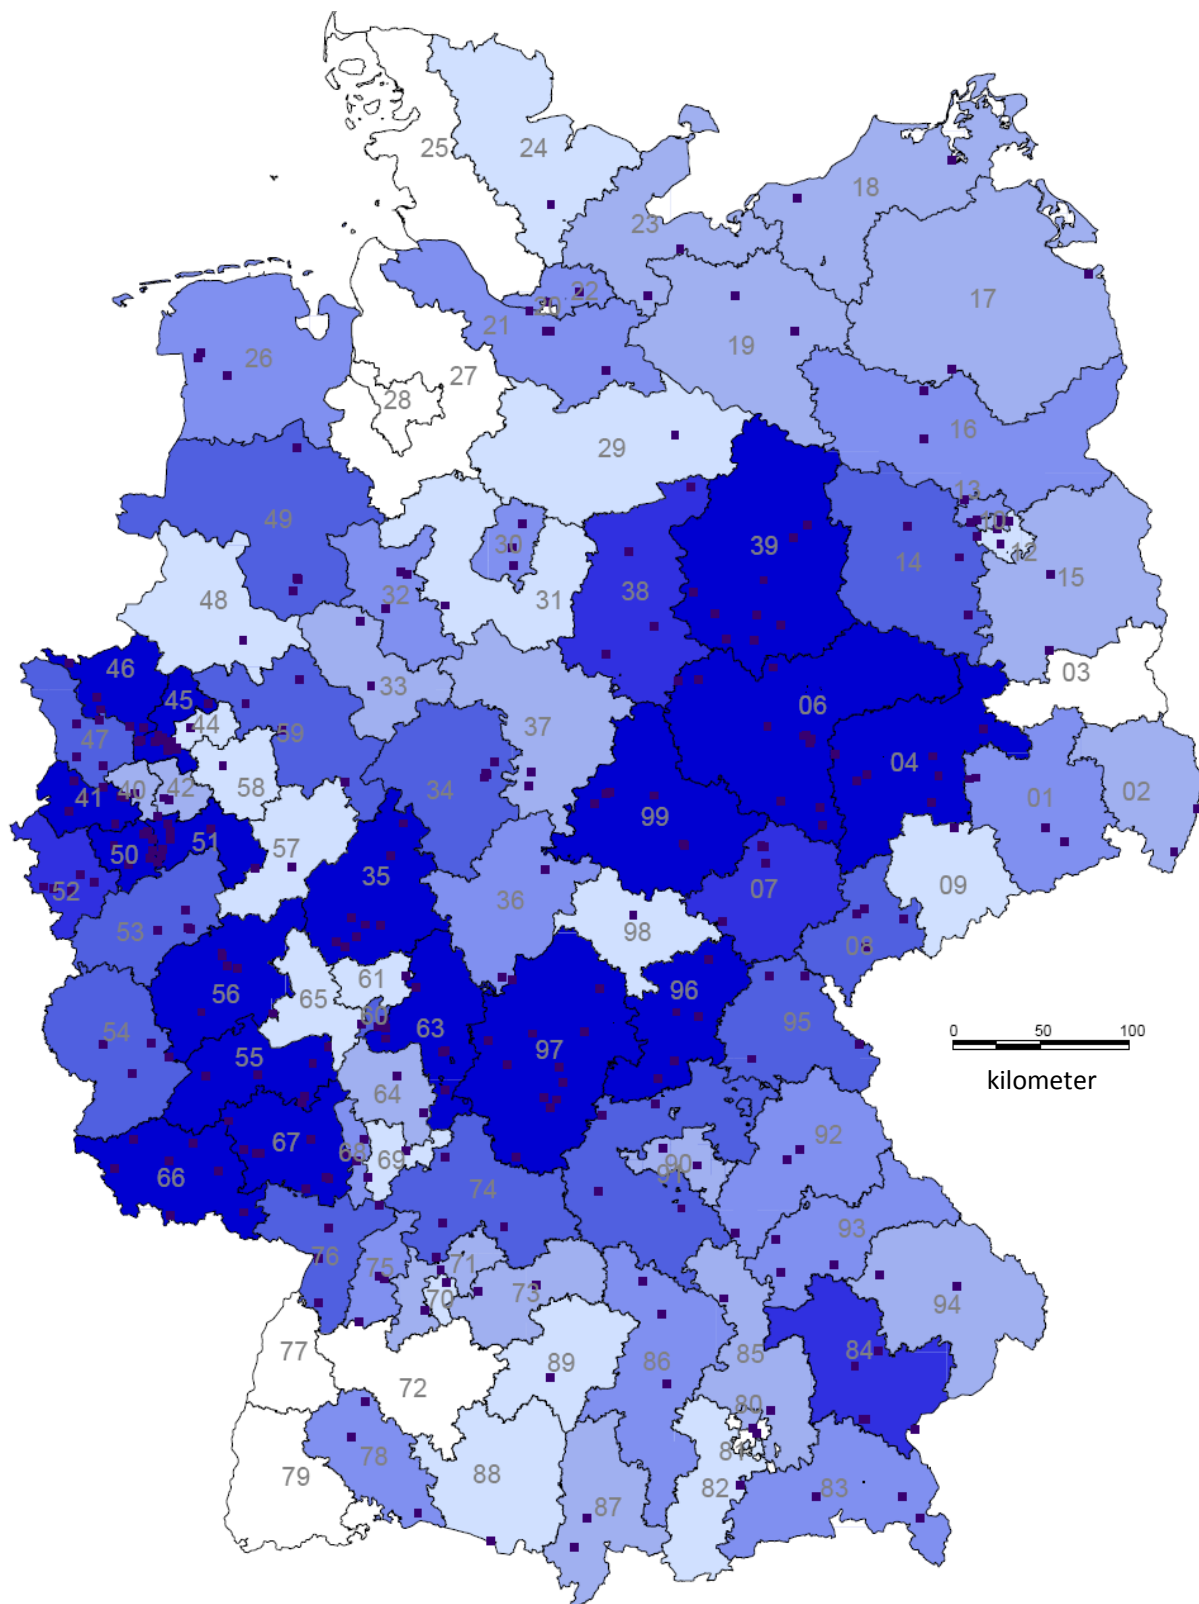

Office location

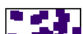

# of offices per region

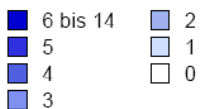

Border 1<sup>st</sup> 2 digit zipcode

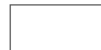

1<sup>st</sup> 2 digits zipcode

15

Supplement: MOESM3 [file 9539988]
